# Supplementary material
Source: publisher figshare collection journal article supplement (https://acs.figshare.com/ndownloader/files/5219395)
Supplement: Supplementary file 1 [file 5219395]

#===============================================================================
data_global
#===============================================================================

# 1. SUBMISSION DETAILS

_publ_contact_author       #Name and address of author for correspondence
;
 ?
;
_publ_contact_author_phone     ?
_publ_contact_author_fax       ?
_publ_contact_author_email     ?

_publ_requested_journal         Acta_Crystallographica_C
_publ_requested_coeditor_name  ?

_publ_contact_letter
;
 ? #Insert text if wanted
;

#===============================================================================

# 2. PROCESSING SUMMARY  (IUCr Office Use Only)

_journal_date_recd_electronic  ?
_journal_date_to_coeditor      ?
_journal_date_from_coeditor    ?
_journal_date_accepted         ?
_journal_date_printers_first   ?
_journal_date_printers_final   ?
_journal_date_proofs_out       ?
_journal_date_proofs_in        ?
_journal_coeditor_name         ?
_journal_coeditor_code         ?
_journal_coeditor_notes
; ?
;
_journal_techeditor_code       ?
_journal_techeditor_notes
; ?
;
_journal_coden_ASTM            ?
_journal_name_full             ?
_journal_year                  ?
_journal_volume                ?
_journal_issue                 ?
_journal_page_first            ?
_journal_page_last             ?
_journal_suppl_publ_number      ?
_journal_suppl_publ_pages       ?

#===============================================================================

# 3. TITLE AND AUTHOR LIST

_publ_section_title
;
 ? #Insert chemical title here
;
# The loop structure below should contain the names and addresses of all
# authors, in the required order of publication. Repeat as necessary.

loop_
        _publ_author_name
        _publ_author_address
' ?'    #<--'Last name, first name
' ?'
#===============================================================================

# 4. TEXT
_publ_section_abstract
;
 ?  #Insert appropriate text here if wanted.
;
_publ_section_comment
;
 ?  #Insert appropriate text here if wanted.
;
_publ_section_experimental
;
 ?  #Insert appropriate text here if wanted.
;
_publ_section_references
;
 Gabe, E.J., Le Page, Y., Charland,.J.-P., Lee, F.L. and White, P.S.
 (1989) J. Appl. Cryst., 22, 384-387.

 Flack, H., (1983) Acta Cryst., A39, 876-881.

 International Tables for X-ray Crystallography, Vol. IV, (1974)
 Kynoch Press, Birmingham, England.

 Johnson, C.K., (1976) ORTEP - A Fortran Thermal Ellipsoid Plot
 Program, Technical Report ORNL-5138, Oak Ridge National Lab., U.S.A.

 Larson, A.C., (1970) p.293, Crystallographic Computing, Munksgaard,
 Copenhagen.

 Le Page, Y., (1988) J. Appl. Cryst., 21, 983-984.

 Le Page, Y. and Gabe, E.J., (1979) J. Appl. Cryst., 12, 464-466.

 Rogers, D., (1981) Acta Cryst., A37, 734-741.

 ?  #Insert any other references here
;
_publ_section_figure_captions
;
 ?  #Insert figure captions here if wanted
;
_publ_section_acknowledgements
;
 ?  #Insert any acknowledgements here.
;

#===============================================================================

# If more than one structure is reported, sections 5-10 should be filled in
# per structure.  For each data set, replace the ? in the data_? line below
# by a unique identifier.

data_c01069

#===============================================================================

# 5. CHEMICAL DATA

_chemical_name_systematic
;
 ?  #Insert the chemical name here.
;
_chemical_name_common             ?
_chemical_formula_moiety         'Fe Mg0.50 Cl2 C38 H85 N6 O28.50 '
_chemical_formula_structural     ?
_chemical_formula_analytical     ?
_chemical_formula_sum            'Fe Mg0.50 Cl2 C38 H85 N6 O28.50 '
_chemical_formula_weight        1221.01
_chemical_compound_source        ?

loop_
     _atom_type_symbol
     _atom_type_description
     _atom_type_scat_dispersion_real
     _atom_type_scat_dispersion_imag
     _atom_type_scat_source
  Fe    ?  0.346  0.844 'International Tables Vol. IV Table 2.2B'
  Mg    ?  0.049  0.036 'International Tables Vol. IV Table 2.2B'
  Cl    ?  0.148  0.159 'International Tables Vol. IV Table 2.2B'
  C     ?  0.003  0.002 'International Tables Vol. IV Table 2.2B'
  H     ?  0.000  0.000 'International Tables Vol. IV Table 2.2B'
  N     ?  0.006  0.003 'International Tables Vol. IV Table 2.2B'
  O     ?  0.011  0.006 'International Tables Vol. IV Table 2.2B'

#===============================================================================

# 6. CRYSTAL DATA

_symmetry_cell_setting            Monoclinic   
_symmetry_space_group_name_H-M    'P 21/c'

loop_
     _symmetry_equiv_pos_as_xyz

   x,y,z
   -x,-y,-z
   -x,1/2+y,1/2-z
   x,1/2-y,1/2+z
_cell_length_a                     19.8327(11)
_cell_length_b                     20.4111(11)
_cell_length_c                     15.1698(8)
_cell_angle_alpha                  90.0
_cell_angle_beta                   96.435(1)
_cell_angle_gamma                  90.0
_cell_volume                     6102.2(6)
_cell_formula_units_Z               4
_cell_measurement_temperature      173
_cell_measurement_reflns_used    6024
_cell_measurement_theta_min         2.50
_cell_measurement_theta_max        25.00
_cell_special_details
;
 ?  #Insert any comments here.
;
_exptl_crystal_description        ?
_exptl_crystal_colour             ?
_exptl_crystal_size_max           0.35
_exptl_crystal_size_mid           0.20
_exptl_crystal_size_min           0.01
_exptl_crystal_size_rad           ?
_exptl_crystal_density_meas       ?
_exptl_crystal_density_diffrn     1.329
_exptl_crystal_density_method     ?
_exptl_crystal_F_000             2600.59
_exptl_absorpt_coefficient_mu     0.42
_exptl_absorpt_correction_type    none
_exptl_absorpt_correction_T_min   1.0000
_exptl_absorpt_correction_T_max   1.0000

#===============================================================================

# 7. EXPERIMENTAL DATA

_exptl_special_details
;
 ?  #Insert any special details here.
;

_diffrn_ambient_temperature      173
_diffrn_radiation_wavelength     0.71073
_diffrn_radiation_type           'Molybdenum K\a'
_diffrn_radiation_source         'xray tube'

_diffrn_radiation_monochromator  graphite
_diffrn_measurement_device       'Bruker SMART'
_diffrn_measurement_method       'Omega scan'
_diffrn_standards_number         ?
_diffrn_standards_interval_count ?
_diffrn_standards_interval_time  ?
_diffrn_standards_decay_%        ?
loop_
     _diffrn_standard_refln_index_h
     _diffrn_standard_refln_index_k
     _diffrn_standard_refln_index_l
    ?   ?   ?

_diffrn_reflns_number            22463
_diffrn_reflns_av_R_equivalents  0.038
_diffrn_reflns_av_sigmaI/netI    ?
_diffrn_reflns_limit_h_min      -23
_diffrn_reflns_limit_h_max       23
_diffrn_reflns_limit_k_min        0
_diffrn_reflns_limit_k_max       24
_diffrn_reflns_limit_l_min        0
_diffrn_reflns_limit_l_max       17
_diffrn_reflns_theta_min         0.00
_diffrn_reflns_theta_max        25.00
_diffrn_reflns_reduction_process ?

_reflns_number_total             10532
_reflns_number_observed           5717
_reflns_observed_criterion       'Inet > 2.5\s(Inet)'

_computing_data_collection       'Bruker SMART'
_computing_cell_refinement       'Bruker SAINT'
_computing_data_reduction        'Bruker SAINT/NRCVAX DATRD2'
_computing_structure_solution    'NRCVAX SOLVER'
_computing_structure_refinement  'NRCVAX LSTSQ'
_computing_molecular_graphics    'NRCVAX'
_computing_publication_material  'NRCVAX TABLES Jan 94 Version'

#===============================================================================

# 8. REFINEMENT DATA

_refine_special_details
;
 ?  #Insert any special details here.
;

_refine_ls_structure_factor_coef  F
_refine_ls_matrix_type            full
_refine_ls_weighting_scheme       1/(\s^2^(F)+0.0002F^2^)
_refine_ls_hydrogen_treatment     ?
_refine_ls_extinction_method      Larson
_refine_ls_extinction_coef        0.799(20)
_refine_ls_number_reflns          5713
_refine_ls_number_parameters       701
_refine_ls_number_restraints      ?
_refine_ls_number_constraints     ?
_refine_ls_R_factor_all           0.125
_refine_ls_R_factor_obs           0.071
_refine_ls_wR_factor_all          0.091
_refine_ls_wR_factor_obs          0.086
_refine_ls_goodness_of_fit_all    ?
_refine_ls_goodness_of_fit_obs    2.48
_refine_ls_restrained_S_all       ?
_refine_ls_restrained_S_obs       ?
_refine_ls_shift/esd_max          0.027
_refine_ls_shift/esd_mean         ?
_refine_diff_density_max          0.63
_refine_diff_density_min         -0.38

#===============================================================================

# 9. ATOMIC COORDINATES AND THERMAL PARAMETERS

loop_
     _atom_site_label
     _atom_site_fract_x
     _atom_site_fract_y
     _atom_site_fract_z
     _atom_site_U_iso_or_equiv
     _atom_site_thermal_displace_type
     _atom_site_calc_flag
     _atom_site_refinement_flags
     _atom_site_type_symbol
Fe1  0.30198(4)  0.49817(4)  0.27461(6)  0.0308(5)  Uij  ?   .  Fe
Mg1  0.50000  0.50000  0.50000  0.0378(18)  Uij  ?   S  Mg
N1  0.0914(3)  0.49068(24)  0.8286(4)  0.039(3)  Uij  ?   .  N
C2  0.1513(3)  0.4587(3)  0.7952(5)  0.044(4)  Uij  ?   .  C
C3  0.1584(3)  0.4796(3)  0.7016(5)  0.036(4)  Uij  ?   .  C
C4  0.2132(3)  0.4426(3)  0.6606(4)  0.033(4)  Uij  ?   .  C
C5  0.2141(3)  0.4611(3)  0.5639(4)  0.036(4)  Uij  ?   .  C
C6  0.2611(3)  0.4189(3)  0.5174(5)  0.037(4)  Uij  ?   .  C
N7  0.2593(3)  0.43450(25)  0.4225(4)  0.035(3)  Uij  ?   .  N
C8  0.2205(3)  0.4100(3)  0.3537(6)  0.037(4)  Uij  ?   .  C
C9  0.1697(3)  0.3572(3)  0.3652(5)  0.045(4)  Uij  ?   .  C
C10  0.1820(3)  0.2946(3)  0.3109(6)  0.053(5)  Uij  ?   .  C
C11  0.2471(4)  0.2600(3)  0.3416(6)  0.049(5)  Uij  ?   .  C
O12  0.2754(3)  0.2665(3)  0.4200(4)  0.071(4)  Uij  ?   .  O
N13  0.2710(3)  0.2220(3)  0.2821(4)  0.052(4)  Uij  ?   .  N
C14  0.3353(4)  0.1871(3)  0.2961(6)  0.055(5)  Uij  ?   .  C
C15  0.3831(4)  0.2125(3)  0.2329(5)  0.053(5)  Uij  ?   .  C
C16  0.4045(4)  0.2838(3)  0.2511(5)  0.047(4)  Uij  ?   .  C
C17  0.4431(3)  0.3134(3)  0.1813(5)  0.045(4)  Uij  ?   .  C
C18  0.4614(3)  0.3841(3)  0.1982(4)  0.037(4)  Uij  ?   .  C
N19  0.4011(3)  0.42517(24)  0.1987(4)  0.032(3)  Uij  ?   .  N
C20  0.3632(3)  0.4503(3)  0.1302(5)  0.034(4)  Uij  ?   .  C
C21  0.3794(3)  0.4398(4)  0.0366(5)  0.046(4)  Uij  ?   .  C
C22  0.3782(4)  0.5034(4) -0.0154(5)  0.054(5)  Uij  ?   .  C
C23  0.4294(4)  0.5528(4)  0.0274(6)  0.051(5)  Uij  ?   .  C
O24  0.4700(3)  0.5388(3)  0.0909(4)  0.058(4)  Uij  ?   .  O
N25  0.4253(3)  0.6120(4) -0.0118(4)  0.062(4)  Uij  ?   .  N
C26  0.4632(5)  0.6687(4)  0.0232(6)  0.078(7)  Uij  ?   .  C
C27  0.4161(5)  0.7234(4)  0.0463(6)  0.077(6)  Uij  ?   .  C
C28  0.3735(4)  0.7053(4)  0.1213(5)  0.054(5)  Uij  ?   .  C
C29  0.4163(3)  0.6941(3)  0.2085(5)  0.050(5)  Uij  ?   .  C
C30  0.3761(4)  0.6892(3)  0.2898(5)  0.047(4)  Uij  ?   .  C
N31  0.3303(3)  0.63295(24)  0.2822(4)  0.037(3)  Uij  ?   .  N
C32  0.2657(4)  0.6305(3)  0.2566(5)  0.040(4)  Uij  ?   .  C
C33  0.2246(4)  0.6905(3)  0.2357(7)  0.069(6)  Uij  ?   .  C
O34  0.29973(20)  0.48676(19)  0.4048(3)  0.0334(24)  Uij  ?   .  O
O35  0.22555(20)  0.43252(21)  0.2765(3)  0.037(3)  Uij  ?   .  O
O36  0.37988(20)  0.43682(19)  0.2799(3)  0.031(3)  Uij  ?   .  O
O37  0.31159(21)  0.48402(20)  0.1440(3)  0.036(3)  Uij  ?   .  O
O38  0.36354(20)  0.57398(19)  0.2957(3)  0.035(3)  Uij  ?   .  O
O39  0.23766(20)  0.57444(21)  0.2482(3)  0.035(3)  Uij  ?   .  O
O41  0.9935(3)  0.5693(3)  0.6954(4)  0.071(4)  Uij  ?   .  O
C42  1.0294(5)  0.6224(5)  0.6654(7)  0.085(7)  Uij  ?   .  C
C43  1.0582(5)  0.6633(5)  0.7431(8)  0.087(8)  Uij  ?   .  C
O44  1.1034(3)  0.62894(24)  0.7992(4)  0.063(4)  Uij  ?   .  O
C45  1.1357(5)  0.6684(5)  0.8698(8)  0.089(7)  Uij  ?   .  C
C46  1.1818(6)  0.6267(6)  0.9296(8)  0.098(8)  Uij  ?   .  C
O47  1.1421(4)  0.5824(3)  0.9698(5)  0.092(5)  Uij  ?   .  O
C48  1.1796(6)  0.5456(7)  1.0306(8)  0.107(9)  Uij  ?   .  C
C49  1.1394(7)  0.4985(6)  1.0754(7)  0.102(8)  Uij  ?   .  C
O50  1.1046(3)  0.4548(4)  1.0109(5)  0.089(5)  Uij  ?   .  O
C51  1.0613(8)  0.4118(7)  1.0442(9)  0.131(11)  Uij  ?   .  C
C52  1.0340(7)  0.3642(6)  0.9762(14)  0.161(14)  Uij  ?   .  C
O53  1.0004(4)  0.3920(3)  0.8963(7)  0.124(6)  Uij  ?   .  O
C54  0.9829(9)  0.3484(6)  0.8230(12)  0.145(14)  Uij  ?   .  C
C55  0.9395(7)  0.3842(7)  0.7556(11)  0.127(12)  Uij  ?   .  C
O56  0.9738(3)  0.4365(3)  0.7275(5)  0.088(5)  Uij  ?   .  O
C57  0.9317(5)  0.4725(7)  0.6618(10)  0.123(10)  Uij  ?   .  C
C58  0.9718(5)  0.5252(6)  0.6277(7)  0.092(8)  Uij  ?   .  C
Cl1  0.33390(11)  0.61464(9)  0.74077(15)  0.0579(13)  Uij  ?   .  Cl
O81  0.3305(3)  0.5504(3)  0.7726(5)  0.101(5)  Uij  ?   .  O
O82  0.3749(4)  0.6177(4)  0.6676(5)  0.120(6)  Uij  ?   .  O
O83  0.2697(3)  0.6401(3)  0.7115(5)  0.111(5)  Uij  ?   .  O
O84  0.3686(4)  0.6533(3)  0.8069(5)  0.124(6)  Uij  ?   .  O
Cl2  0.05174(12)  0.18691(11)  0.08289(17)  0.0686(15)  Uij  ?   .  Cl
O85  0.0866(3)  0.2178(3)  0.0169(5)  0.109(5)  Uij  ?   .  O
O86  0.0907(4)  0.1914(5)  0.1691(6)  0.156(7)  Uij  ?   .  O
O87 -0.0140(4)  0.2117(4)  0.0819(6)  0.147(7)  Uij  ?   .  O
O88  0.0515(5)  0.1207(3)  0.0624(5)  0.138(8)  Uij  ?   .  O
O91  0.48946(21)  0.55540(20)  0.3842(3)  0.039(3)  Uij  ?   .  O
O92  0.46283(21)  0.41959(20)  0.4299(3)  0.042(3)  Uij  ?   .  O
O93  0.40292(21)  0.52629(21)  0.5244(3)  0.044(3)  Uij  ?   .  O
O94  0.43828(23)  0.04531(21)  0.2582(3)  0.051(3)  Uij  ?   .  O
O95  0.2245(3)  0.2502(3)  0.0927(4)  0.084(4)  Uij  ?   .  O
O96  0.4092(3)  0.3060(3)  0.4928(4)  0.074(4)  Uij  ?   .  O
C97  0.1403(12)  0.7802(8)  0.0515(13)  0.092(15)  Uij  ?   .  C
C98  0.1782(11)  0.8308(9)  0.0198(20)  0.112(17)  Uij  ?   .  C
O99  0.2375(14)  0.8368(11) -0.0230(13)  0.193(21)  Uij  ?   .  O
H1a  0.087  0.477  0.888  0.0499  Uiso  ?  .  H
H1b  0.097  0.537  0.827  0.0499  Uiso  ?  .  H
H1c  0.051  0.479  0.791  0.0499  Uiso  ?  .  H
H2a  0.146  0.412  0.797  0.0549  Uiso  ?  .  H
H2b  0.192  0.471  0.833  0.0549  Uiso  ?  .  H
H3a  0.116  0.472  0.666  0.0463  Uiso  ?  .  H
H3b  0.169  0.526  0.702  0.0463  Uiso  ?  .  H
H4a  0.256  0.453  0.692  0.0438  Uiso  ?  .  H
H4b  0.205  0.396  0.665  0.0438  Uiso  ?  .  H
H5a  0.228  0.506  0.560  0.0477  Uiso  ?  .  H
H5b  0.169  0.456  0.534  0.0477  Uiso  ?  .  H
H6a  0.248  0.374  0.523  0.0477  Uiso  ?  .  H
H6b  0.306  0.425  0.546  0.0477  Uiso  ?  .  H
H9a  0.173  0.345  0.427  0.0565  Uiso  ?  .  H
H9b  0.125  0.374  0.347  0.0565  Uiso  ?  .  H
H10a  0.185  0.308  0.251  0.0640  Uiso  ?  .  H
H10b  0.145  0.264  0.313  0.0640  Uiso  ?  .  H
H13  0.245  0.218  0.225  0.0624  Uiso  ?  .  H
H14a  0.355  0.196  0.356  0.0663  Uiso  ?  .  H
H14b  0.328  0.141  0.289  0.0663  Uiso  ?  .  H
H15a  0.423  0.186  0.236  0.0629  Uiso  ?  .  H
H15b  0.360  0.210  0.174  0.0629  Uiso  ?  .  H
H16a  0.433  0.285  0.306  0.0578  Uiso  ?  .  H
H16b  0.365  0.310  0.256  0.0578  Uiso  ?  .  H
H17a  0.484  0.288  0.178  0.0555  Uiso  ?  .  H
H17b  0.415  0.311  0.126  0.0555  Uiso  ?  .  H
H18a  0.489  0.400  0.154  0.0481  Uiso  ?  .  H
H18b  0.487  0.387  0.256  0.0481  Uiso  ?  .  H
H21a  0.424  0.421  0.039  0.0565  Uiso  ?  .  H
H21b  0.347  0.410  0.007  0.0565  Uiso  ?  .  H
H22a  0.334  0.522 -0.016  0.0650  Uiso  ?  .  H
H22b  0.388  0.495 -0.075  0.0650  Uiso  ?  .  H
H25  0.395  0.618 -0.065  0.0735  Uiso  ?  .  H
H26a  0.492  0.656  0.076  0.0922  Uiso  ?  .  H
H26b  0.491  0.684 -0.020  0.0922  Uiso  ?  .  H
H27a  0.442  0.762  0.065  0.0897  Uiso  ?  .  H
H27b  0.386  0.733 -0.006  0.0897  Uiso  ?  .  H
H28a  0.349  0.666  0.105  0.0652  Uiso  ?  .  H
H28b  0.342  0.740  0.130  0.0652  Uiso  ?  .  H
H29a  0.441  0.654  0.204  0.0611  Uiso  ?  .  H
H29b  0.448  0.730  0.218  0.0611  Uiso  ?  .  H
H30a  0.349  0.728  0.291  0.0571  Uiso  ?  .  H
H30b  0.406  0.686  0.344  0.0571  Uiso  ?  .  H
H33a  0.178  0.678  0.218  0.0808  Uiso  ?  .  H
H33b  0.226  0.718  0.288  0.0808  Uiso  ?  .  H
H33c  0.242  0.714  0.189  0.0808  Uiso  ?  .  H
H42a  1.068  0.606  0.639  0.0956  Uiso  ?  .  H
H42b  1.001  0.648  0.623  0.0956  Uiso  ?  .  H
H43a  1.021  0.675  0.774  0.0988  Uiso  ?  .  H
H43b  1.079  0.702  0.723  0.0988  Uiso  ?  .  H
H45a  1.161  0.703  0.846  0.0994  Uiso  ?  .  H
H45b  1.102  0.687  0.903  0.0994  Uiso  ?  .  H
H46a  1.208  0.653  0.974  0.1077  Uiso  ?  .  H
H46b  1.212  0.604  0.895  0.1077  Uiso  ?  .  H
H48a  1.213  0.523  1.002  0.1149  Uiso  ?  .  H
H48b  1.201  0.573  1.077  0.1149  Uiso  ?  .  H
H49a  1.106  0.521  1.105  0.1101  Uiso  ?  .  H
H49b  1.168  0.473  1.117  0.1101  Uiso  ?  .  H
H51a  1.024  0.436  1.064  0.1450  Uiso  ?  .  H
H51b  1.085  0.388  1.093  0.1450  Uiso  ?  .  H
H52a  1.071  0.337  0.962  0.1673  Uiso  ?  .  H
H52b  1.001  0.337  1.001  0.1673  Uiso  ?  .  H
H54a  0.960  0.311  0.843  0.1625  Uiso  ?  .  H
H54b  1.023  0.334  0.798  0.1625  Uiso  ?  .  H
H55a  0.899  0.398  0.780  0.1417  Uiso  ?  .  H
H55b  0.927  0.355  0.707  0.1417  Uiso  ?  .  H
H57a  0.914  0.443  0.615  0.1297  Uiso  ?  .  H
H57b  0.895  0.491  0.689  0.1297  Uiso  ?  .  H
H58a  0.943  0.548  0.583  0.1001  Uiso  ?  .  H
H58b  1.010  0.507  0.602  0.1001  Uiso  ?  .  H
H91a  0.494  0.588  0.430  0.0490  Uiso  ?  .  H
H91b  0.444  0.569  0.367  0.0489  Uiso  ?  .  H
H92a  0.481  0.378  0.451  0.0512  Uiso  ?  .  H
H93a  0.390  0.561  0.562  0.0538  Uiso  ?  .  H
H92b  0.429  0.423  0.379  0.0512  Uiso  ?  .  H
H93b  0.366  0.501  0.495  0.0538  Uiso  ?  .  H
H94a  0.460  0.068  0.213  0.0624  Uiso  ?  .  H
H94b  0.413  0.006  0.250  0.0624  Uiso  ?  .  H
H95a  0.228  0.214  0.053  0.0943  Uiso  ?  .  H
H95b  0.179  0.268  0.083  0.0943  Uiso  ?  .  H
H96a  0.402  0.323  0.550  0.0856  Uiso  ?  .  H
H96b  0.390  0.268  0.462  0.0856  Uiso  ?  .  H
H97a  0.104  0.796  0.083  0.1048  Uiso  ?  .  H
H97b  0.122  0.755  0.001  0.1048  Uiso  ?  .  H
H97c  0.170  0.753  0.090  0.1048  Uiso  ?  .  H
H98a  0.144  0.856 -0.015  0.1156  Uiso  ?  .  H
H98b  0.192  0.854  0.074  0.1156  Uiso  ?  .  H
H99  0.244  0.882 -0.035  0.2057  Uiso  ?  .  H

loop_
     _atom_site_aniso_label
     _atom_site_aniso_U_11
     _atom_site_aniso_U_22
     _atom_site_aniso_U_33
     _atom_site_aniso_U_12
     _atom_site_aniso_U_13
     _atom_site_aniso_U_23
     _atom_site_aniso_type_symbol
Fe1 0.0314(5) 0.0405(5) 0.0221(6) -0.0016(5) 0.0102(4) -0.0032(5) Fe
Mg1 0.0391(17) 0.0525(19) 0.0226(19) 0.0032(17) 0.0069(14) 0.0015(17) Mg
N1 0.050(3) 0.043(3) 0.026(4) -0.003(3) 0.019(3) -0.003(3) N
C2 0.052(4) 0.049(4) 0.033(5) 0.011(4) 0.019(4) -0.002(4) C
C3 0.045(4) 0.037(4) 0.027(5) 0.001(3) 0.012(3) -0.003(3) C
C4 0.035(4) 0.036(4) 0.030(5) -0.002(3) 0.011(3) -0.005(3) C
C5 0.047(4) 0.037(4) 0.029(5) 0.010(3) 0.022(4) 0.000(3) C
C6 0.044(4) 0.039(4) 0.030(5) 0.004(3) 0.019(3) 0.005(3) C
N7 0.041(3) 0.037(3) 0.030(4) -0.003(3) 0.019(3) -0.003(3) N
C8 0.033(4) 0.037(4) 0.044(6) 0.004(3) 0.018(4) -0.012(4) C
C9 0.043(4) 0.043(4) 0.054(6) -0.009(3) 0.022(4) -0.015(4) C
C10 0.039(4) 0.046(5) 0.077(7) -0.011(4) 0.017(4) -0.019(4) C
C11 0.056(5) 0.038(4) 0.057(6) -0.008(4) 0.020(5) -0.008(4) C
O12 0.064(4) 0.081(4) 0.070(5) 0.006(3) 0.018(4) -0.015(4) O
N13 0.052(4) 0.048(4) 0.058(5) 0.002(3) 0.016(3) -0.019(3) N
C14 0.059(5) 0.034(4) 0.077(7) 0.007(4) 0.022(5) -0.005(4) C
C15 0.056(5) 0.045(4) 0.059(6) 0.010(4) 0.006(4) -0.008(4) C
C16 0.050(5) 0.053(5) 0.041(5) 0.005(4) 0.015(4) -0.005(4) C
C17 0.046(4) 0.050(4) 0.040(5) 0.009(4) 0.015(4) 0.004(4) C
C18 0.035(4) 0.049(4) 0.030(5) 0.008(3) 0.015(3) 0.003(3) C
N19 0.033(3) 0.041(3) 0.023(4) 0.001(3) 0.013(3) -0.002(3) N
C20 0.040(4) 0.038(4) 0.026(5) -0.001(4) 0.010(4) -0.007(3) C
C21 0.051(5) 0.063(5) 0.025(5) 0.013(4) 0.012(4) -0.004(4) C
C22 0.058(5) 0.084(6) 0.024(5) 0.017(5) 0.016(4) 0.008(5) C
C23 0.057(5) 0.068(6) 0.034(6) 0.012(5) 0.031(5) 0.005(5) C
O24 0.058(3) 0.080(4) 0.037(4) 0.004(3) 0.012(3) 0.010(3) O
N25 0.081(5) 0.070(5) 0.040(5) 0.016(4) 0.026(4) 0.013(4) N
C26 0.100(7) 0.075(6) 0.072(7) 0.011(6) 0.067(6) 0.015(5) C
C27 0.103(7) 0.076(6) 0.060(7) 0.016(5) 0.045(6) 0.022(5) C
C28 0.058(5) 0.064(5) 0.044(6) 0.014(4) 0.019(4) 0.006(4) C
C29 0.045(5) 0.049(5) 0.060(6) -0.008(4) 0.021(4) 0.003(4) C
C30 0.055(5) 0.045(4) 0.041(5) -0.005(4) 0.010(4) -0.009(4) C
N31 0.043(4) 0.033(3) 0.036(4) -0.002(3) 0.017(3) -0.004(3) N
C32 0.037(5) 0.050(5) 0.035(5) 0.002(4) 0.016(4) -0.005(4) C
C33 0.042(4) 0.046(5) 0.124(9) 0.012(4) 0.036(5) 0.002(5) C
O34 0.043(3) 0.040(3) 0.020(3) -0.0127(22) 0.0158(21) -0.0035(20) O
O35 0.034(3) 0.053(3) 0.027(3) -0.0092(22) 0.0103(22) -0.0073(24) O
O36 0.0369(25) 0.044(3) 0.014(3) -0.0007(21) 0.0091(21) 0.0011(20) O
O37 0.0351(24) 0.048(3) 0.027(3) 0.0053(22) 0.0108(21) -0.0057(21) O
O38 0.0340(25) 0.041(3) 0.031(3) -0.0034(22) 0.0053(21) 0.0009(22) O
O39 0.0276(25) 0.043(3) 0.037(3) -0.0022(22) 0.0110(22) -0.0039(23) O
O41 0.064(4) 0.085(4) 0.062(5) 0.019(3) -0.003(3) -0.007(4) O
C42 0.089(7) 0.087(7) 0.080(9) 0.027(6) 0.014(6) 0.025(7) C
C43 0.086(7) 0.066(6) 0.114(10) 0.006(6) 0.030(7) 0.026(7) C
O44 0.063(4) 0.052(3) 0.077(5) 0.002(3) 0.019(3) 0.011(3) O
C45 0.083(7) 0.072(6) 0.113(10) -0.027(6) 0.017(7) -0.040(7) C
C46 0.097(8) 0.097(8) 0.098(10) -0.032(7) 0.008(7) -0.034(7) C
O47 0.093(5) 0.104(5) 0.074(6) -0.005(4) -0.006(4) -0.020(4) O
C48 0.090(8) 0.170(12) 0.055(8) 0.024(8) -0.025(6) 0.009(8) C
C49 0.136(10) 0.133(10) 0.031(6) 0.054(8) -0.016(7) -0.008(7) C
O50 0.087(4) 0.126(6) 0.057(5) 0.029(4) 0.024(4) 0.040(5) O
C51 0.192(14) 0.105(10) 0.107(12) 0.022(10) 0.068(11) 0.067(9) C
C52 0.140(12) 0.090(10) 0.242(22) -0.004(9) -0.027(13) 0.097(12) C
O53 0.146(7) 0.071(5) 0.171(9) -0.006(5) 0.093(7) 0.020(6) O
C54 0.199(17) 0.063(8) 0.195(19) -0.085(10) 0.121(14) -0.053(10) C
C55 0.121(11) 0.094(10) 0.180(17) -0.043(9) 0.073(11) -0.054(10) C
O56 0.058(4) 0.081(4) 0.128(7) -0.009(4) 0.029(4) -0.046(4) O
C57 0.049(6) 0.136(10) 0.174(14) 0.034(7) -0.026(8) -0.092(10) C
C58 0.057(6) 0.124(9) 0.090(9) 0.030(6) -0.015(6) -0.032(7) C
Cl1 0.0631(13) 0.0469(12) 0.0625(16) 0.0036(11) 0.0015(12) 0.0011(11) Cl
O81 0.115(5) 0.056(4) 0.125(7) -0.010(4) -0.016(4) 0.030(4) O
O82 0.147(7) 0.133(6) 0.091(6) 0.008(5) 0.062(6) -0.017(5) O
O83 0.055(4) 0.124(5) 0.154(8) 0.036(4) 0.009(4) 0.045(5) O
O84 0.205(8) 0.058(4) 0.095(6) -0.012(5) -0.036(5) -0.021(4) O
Cl2 0.0760(16) 0.0667(15) 0.0676(18) 0.0065(12) 0.0284(14) -0.0007(13) Cl
O85 0.118(6) 0.092(5) 0.128(7) 0.022(4) 0.067(5) 0.038(4) O
O86 0.142(7) 0.230(10) 0.095(7) -0.076(7) 0.014(6) -0.065(7) O
O87 0.100(6) 0.163(7) 0.191(10) 0.068(5) 0.078(6) 0.059(6) O
O88 0.242(10) 0.061(4) 0.116(7) 0.024(5) 0.034(7) 0.008(4) O
O91 0.041(3) 0.050(3) 0.025(3) 0.0018(22) 0.0038(22) 0.0033(22) O
O92 0.047(3) 0.052(3) 0.025(3) 0.0095(23) -0.0041(23) 0.0010(22) O
O93 0.038(3) 0.058(3) 0.036(3) 0.0047(23) 0.0079(23) -0.0150(24) O
O94 0.059(3) 0.053(3) 0.045(4) -0.011(3) 0.025(3) 0.0005(25) O
O95 0.085(4) 0.090(4) 0.078(5) 0.017(4) 0.015(4) -0.017(4) O
O96 0.097(4) 0.078(4) 0.052(4) 0.001(3) 0.024(3) -0.001(3) O
C97 0.170(21) 0.051(11) 0.063(15) 0.042(13) 0.047(14) -0.004(10) C
C98 0.089(16) 0.045(11) 0.18(3) -0.019(12) -0.074(17) -0.021(14) C
O99 0.27(3) 0.208(21) 0.105(17) 0.044(20) 0.059(18) -0.018(14) O

#===============================================================================

# 10. MOLECULAR GEOMETRY

loop_
     _geom_bond_atom_site_label_1
     _geom_bond_atom_site_label_2
     _geom_bond_distance
     _geom_bond_site_symmetry_1
     _geom_bond_site_symmetry_2
     _geom_bond_publ_flag
  Fe(1) O(34)   1.994(4)  ?  ?  ?
  Fe(1) O(35)   2.026(4)  ?  ?  ?
  Fe(1) O(36)   1.983(4)  ?  ?  ?
  Fe(1) O(37)   2.032(4)  ?  ?  ?
  Fe(1) O(38)   1.975(4)  ?  ?  ?
  Fe(1) O(39)   2.024(4)  ?  ?  ?
  Mg(1) O(91)   2.080(4)  ?  ?  ?
  Mg(1) O(91)a  2.080(4)  ?  ?  ?
  Mg(1) O(92)   2.047(4)  ?  ?  ?
  Mg(1) O(92)a  2.047(4)  ?  ?  ?
  Mg(1) O(93)   2.071(4)  ?  ?  ?
  Mg(1) O(93)a  2.071(4)  ?  ?  ?
  Mg(1) H(91a)  2.08459(9)  ?  ?  ?
  Mg(1) H(91a)a 2.08459(9)  ?  ?  ?
  N(1) C(2)     1.495(8)  ?  ?  ?
  N(1) H(1a)    0.960(5)  ?  ?  ?
  N(1) H(1b)    0.960(5)  ?  ?  ?
  N(1) H(1c)    0.960(6)  ?  ?  ?
  C(2) C(3)     1.504(10)  ?  ?  ?
  C(2) H(2a)    0.960(7)  ?  ?  ?
  C(2) H(2b)    0.960(7)  ?  ?  ?
  C(3) C(4)     1.512(8)  ?  ?  ?
  C(3) H(3a)    0.960(7)  ?  ?  ?
  C(3) H(3b)    0.960(6)  ?  ?  ?
  C(4) C(5)     1.517(9)  ?  ?  ?
  C(4) H(4a)    0.960(6)  ?  ?  ?
  C(4) H(4b)    0.960(6)  ?  ?  ?
  C(5) C(6)     1.501(8)  ?  ?  ?
  C(5) H(5a)    0.960(6)  ?  ?  ?
  C(5) H(5b)    0.960(7)  ?  ?  ?
  C(6) N(7)     1.471(9)  ?  ?  ?
  C(6) H(6a)    0.960(6)  ?  ?  ?
  C(6) H(6b)    0.960(7)  ?  ?  ?
  N(7) C(8)     1.324(10)  ?  ?  ?
  N(7) O(34)    1.379(6)  ?  ?  ?
  C(8) C(9)     1.498(9)  ?  ?  ?
  C(8) O(35)    1.273(9)  ?  ?  ?
  C(9) C(10)    1.554(9)  ?  ?  ?
  C(9) H(9a)    0.960(8)  ?  ?  ?
  C(9) H(9b)    0.960(7)  ?  ?  ?
  C(10) C(11)   1.499(11)  ?  ?  ?
  C(10) H(10a)  0.960(8)  ?  ?  ?
  C(10) H(10b)  0.960(6)  ?  ?  ?
  C(11) O(12)   1.264(12)  ?  ?  ?
  C(11) N(13)   1.317(10)  ?  ?  ?
  N(13) C(14)   1.455(9)  ?  ?  ?
  N(13) H(13)   0.960(7)  ?  ?  ?
  C(14) C(15)   1.515(11)  ?  ?  ?
  C(14) H(14a)  0.960(9)  ?  ?  ?
  C(14) H(14b)  0.960(7)  ?  ?  ?
  C(15) C(16)   1.532(10)  ?  ?  ?
  C(15) H(15a)  0.960(7)  ?  ?  ?
  C(15) H(15b)  0.960(8)  ?  ?  ?
  C(16) C(17)   1.503(10)  ?  ?  ?
  C(16) H(16a)  0.960(8)  ?  ?  ?
  C(16) H(16b)  0.960(7)  ?  ?  ?
  C(17) C(18)   1.503(10)  ?  ?  ?
  C(17) H(17a)  0.960(6)  ?  ?  ?
  C(17) H(17b)  0.960(8)  ?  ?  ?
  C(18) N(19)   1.462(8)  ?  ?  ?
  C(18) H(18a)  0.960(6)  ?  ?  ?
  C(18) H(18b)  0.960(7)  ?  ?  ?
  N(19) C(20)   1.316(9)  ?  ?  ?
  N(19) O(36)   1.367(6)  ?  ?  ?
  C(20) C(21)   1.505(9)  ?  ?  ?
  C(20) O(37)   1.271(8)  ?  ?  ?
  C(21) C(22)   1.517(11)  ?  ?  ?
  C(21) H(21a)  0.960(7)  ?  ?  ?
  C(21) H(21b)  0.960(7)  ?  ?  ?
  C(22) C(23)   1.524(13)  ?  ?  ?
  C(22) H(22a)  0.960(7)  ?  ?  ?
  C(22) H(22b)  0.960(7)  ?  ?  ?
  C(23) O(24)   1.219(11)  ?  ?  ?
  C(23) N(25)   1.345(11)  ?  ?  ?
  N(25) C(26)   1.449(13)  ?  ?  ?
  N(25) H(25)   0.960(7)  ?  ?  ?
  C(26) C(27)   1.522(12)  ?  ?  ?
  C(26) H(26a)  0.960(10)  ?  ?  ?
  C(26) H(26b)  0.960(7)  ?  ?  ?
  C(27) C(28)   1.536(11)  ?  ?  ?
  C(27) H(27a)  0.960(9)  ?  ?  ?
  C(27) H(27b)  0.960(10)  ?  ?  ?
  C(28) C(29)   1.507(12)  ?  ?  ?
  C(28) H(28a)  0.960(8)  ?  ?  ?
  C(28) H(28b)  0.960(7)  ?  ?  ?
  C(29) C(30)   1.545(10)  ?  ?  ?
  C(29) H(29a)  0.960(7)  ?  ?  ?
  C(29) H(29b)  0.960(7)  ?  ?  ?
  C(30) N(31)   1.459(9)  ?  ?  ?
  C(30) H(30a)  0.960(7)  ?  ?  ?
  C(30) H(30b)  0.960(8)  ?  ?  ?
  N(31) C(32)   1.299(9)  ?  ?  ?
  N(31) O(38)   1.376(7)  ?  ?  ?
  C(32) C(33)   1.485(10)  ?  ?  ?
  C(32) O(39)   1.271(8)  ?  ?  ?
  C(33) H(33a)  0.960(8)  ?  ?  ?
  C(33) H(33b)  0.960(9)  ?  ?  ?
  C(33) H(33c)  0.960(8)  ?  ?  ?
  O(41) C(42)   1.401(13)  ?  ?  ?
  O(41) C(58)   1.396(13)  ?  ?  ?
  C(42) C(43)   1.504(18)  ?  ?  ?
  C(42) H(42a)  0.960(9)  ?  ?  ?
  C(42) H(42b)  0.960(9)  ?  ?  ?
  C(43) O(44)   1.359(13)  ?  ?  ?
  C(43) H(43a)  0.960(10)  ?  ?  ?
  C(43) H(43b)  0.960(9)  ?  ?  ?
  O(44) C(45)   1.434(12)  ?  ?  ?
  C(45) C(46)   1.483(19)  ?  ?  ?
  C(45) H(45a)  0.960(10)  ?  ?  ?
  C(45) H(45b)  0.960(10)  ?  ?  ?
  C(46) O(47)   1.383(14)  ?  ?  ?
  C(46) H(46a)  0.960(10)  ?  ?  ?
  C(46) H(46b)  0.960(11)  ?  ?  ?
  O(47) C(48)   1.348(14)  ?  ?  ?
  C(48) C(49)   1.464(21)  ?  ?  ?
  C(48) H(48a)  0.960(12)  ?  ?  ?
  C(48) H(48b)  0.960(12)  ?  ?  ?
  C(49) O(50)   1.441(15)  ?  ?  ?
  C(49) H(49a)  0.960(11)  ?  ?  ?
  C(49) H(49b)  0.960(10)  ?  ?  ?
  O(50) C(51)   1.365(16)  ?  ?  ?
  C(51) C(52)   1.48(3)  ?  ?  ?
  C(51) H(51a)  0.960(13)  ?  ?  ?
  C(51) H(51b)  0.960(13)  ?  ?  ?
  C(52) O(53)   1.434(19)  ?  ?  ?
  C(52) H(52a)  0.960(16)  ?  ?  ?
  C(52) H(52b)  0.960(14)  ?  ?  ?
  O(53) C(54)   1.436(19)  ?  ?  ?
  C(54) C(55)   1.46(3)  ?  ?  ?
  C(54) H(54a)  0.960(10)  ?  ?  ?
  C(54) H(54b)  0.960(14)  ?  ?  ?
  C(55) O(56)   1.360(16)  ?  ?  ?
  C(55) H(55a)  0.960(13)  ?  ?  ?
  C(55) H(55b)  0.960(14)  ?  ?  ?
  O(56) C(57)   1.431(17)  ?  ?  ?
  C(57) C(58)   1.466(21)  ?  ?  ?
  C(57) H(57a)  0.960(11)  ?  ?  ?
  C(57) H(57b)  0.960(10)  ?  ?  ?
  C(58) H(58a)  0.960(10)  ?  ?  ?
  C(58) H(58b)  0.960(9)  ?  ?  ?
  Cl(1) O(81)   1.402(6)  ?  ?  ?
  Cl(1) O(82)   1.448(7)  ?  ?  ?
  Cl(1) O(83)   1.401(6)  ?  ?  ?
  Cl(1) O(84)   1.396(7)  ?  ?  ?
  Cl(2) O(85)   1.426(6)  ?  ?  ?
  Cl(2) O(86)   1.445(9)  ?  ?  ?
  Cl(2) O(87)   1.397(7)  ?  ?  ?
  Cl(2) O(88)   1.387(7)  ?  ?  ?
  O(91) H(91a)  0.960(4)  ?  ?  ?
  O(91) H(91b)  0.960(4)  ?  ?  ?
  O(92) H(92a)  0.960(4)  ?  ?  ?
  O(92) H(92b)  0.960(4)  ?  ?  ?
  O(93) H(93a)  0.960(4)  ?  ?  ?
  O(93) H(93b)  0.960(4)  ?  ?  ?
  O(94) H(94a)  0.960(4)  ?  ?  ?
  O(94) H(94b)  0.960(4)  ?  ?  ?
  O(95) H(95a)  0.960(5)  ?  ?  ?
  O(95) H(95b)  0.960(6)  ?  ?  ?
  O(96) H(96a)  0.960(5)  ?  ?  ?
  O(96) H(96b)  0.960(6)  ?  ?  ?
  C(97) C(98)   1.39(3)  ?  ?  ?
  C(97) H(97a)  0.960(18)  ?  ?  ?
  C(97) H(97b)  0.960(21)  ?  ?  ?
  C(97) H(97c)  0.960(19)  ?  ?  ?
  C(98) O(99)   1.41(4)  ?  ?  ?
  C(98) H(98a)  0.960(21)  ?  ?  ?
  C(98) H(98b)  0.960(23)  ?  ?  ?
  O(99) H(99)   0.960(24)  ?  ?  ?
  H(91a) H(91b) 1.35710(5)  ?  ?  ?

loop_
     _geom_contact_atom_site_label_1
     _geom_contact_atom_site_label_2
     _geom_contact_distance
     _geom_contact_site_symmetry_1
     _geom_contact_site_symmetry_2
     _geom_contact_publ_flag
    ?   ?   ?   ?   ?   ?

loop_
     _geom_angle_atom_site_label_1
     _geom_angle_atom_site_label_2
     _geom_angle_atom_site_label_3
     _geom_angle
     _geom_angle_site_symmetry_1
     _geom_angle_site_symmetry_2
     _geom_angle_site_symmetry_3
     _geom_angle_publ_flag
  O(34) Fe(1) O(35)     78.99(18)  ?  ?  ?  ?
  O(34) Fe(1) O(36)     89.40(17)  ?  ?  ?  ?
  O(34) Fe(1) O(37)    164.57(17)  ?  ?  ?  ?
  O(34) Fe(1) O(38)     90.76(17)  ?  ?  ?  ?
  O(34) Fe(1) O(39)    101.69(17)  ?  ?  ?  ?
  O(35) Fe(1) O(36)     99.35(17)  ?  ?  ?  ?
  O(35) Fe(1) O(37)     94.12(17)  ?  ?  ?  ?
  O(35) Fe(1) O(38)    165.04(17)  ?  ?  ?  ?
  O(35) Fe(1) O(39)     93.19(17)  ?  ?  ?  ?
  O(36) Fe(1) O(37)     78.02(17)  ?  ?  ?  ?
  O(36) Fe(1) O(38)     91.34(17)  ?  ?  ?  ?
  O(36) Fe(1) O(39)    164.67(16)  ?  ?  ?  ?
  O(37) Fe(1) O(38)     98.34(17)  ?  ?  ?  ?
  O(37) Fe(1) O(39)     92.41(17)  ?  ?  ?  ?
  O(38) Fe(1) O(39)     78.10(17)  ?  ?  ?  ?
  O(91) Mg(1) O(91)a   180.0  ?  ?  ?  ?
  O(91) Mg(1) O(92)     90.06(17)  ?  ?  ?  ?
  O(91) Mg(1) O(92)a    89.94(17)  ?  ?  ?  ?
  O(91) Mg(1) O(93)     90.14(17)  ?  ?  ?  ?
  O(91) Mg(1) O(93)a    89.86(17)  ?  ?  ?  ?
  O(91) Mg(1) H(91a)    26.65(12)  ?  ?  ?  ?
  O(91) Mg(1) H(91a)a  153.35(12)  ?  ?  ?  ?
  O(91)a Mg(1) O(92)    89.94(17)  ?  ?  ?  ?
  O(91)a Mg(1) O(92)a   90.06(17)  ?  ?  ?  ?
  O(91)a Mg(1) O(93)    89.86(17)  ?  ?  ?  ?
  O(91)a Mg(1) O(93)a   90.14(17)  ?  ?  ?  ?
  O(91)a Mg(1) H(91a)  153.35(12)  ?  ?  ?  ?
  O(91)a Mg(1) H(91a)a  26.65(12)  ?  ?  ?  ?
  O(92) Mg(1) O(92)a   180.0  ?  ?  ?  ?
  O(92) Mg(1) O(93)     90.72(17)  ?  ?  ?  ?
  O(92) Mg(1) O(93)a    89.28(17)  ?  ?  ?  ?
  O(92) Mg(1) H(91a)   115.48(12)  ?  ?  ?  ?
  O(92) Mg(1) H(91a)a   64.52(12)  ?  ?  ?  ?
  O(92)a Mg(1) O(93)    89.28(17)  ?  ?  ?  ?
  O(92)a Mg(1) O(93)a   90.72(17)  ?  ?  ?  ?
  O(92)a Mg(1) H(91a)   64.52(12)  ?  ?  ?  ?
  O(92)a Mg(1) H(91a)a 115.48(12)  ?  ?  ?  ?
  O(93) Mg(1) O(93)a   180.0  ?  ?  ?  ?
  O(93) Mg(1) H(91a)    82.35(13)  ?  ?  ?  ?
  O(93) Mg(1) H(91a)a   97.65(13)  ?  ?  ?  ?
  O(93)a Mg(1) H(91a)   97.65(13)  ?  ?  ?  ?
  O(93)a Mg(1) H(91a)a  82.35(13)  ?  ?  ?  ?
  H(91a) Mg(1) H(91a)a 180.0  ?  ?  ?  ?
  C(2) N(1) H(1a)      110.5(5)  ?  ?  ?  ?
  C(2) N(1) H(1b)      108.9(5)  ?  ?  ?  ?
  C(2) N(1) H(1c)      109.0(5)  ?  ?  ?  ?
  H(1a) N(1) H(1b)     109.5(5)  ?  ?  ?  ?
  H(1a) N(1) H(1c)     109.5(5)  ?  ?  ?  ?
  H(1b) N(1) H(1c)     109.5(5)  ?  ?  ?  ?
  N(1) C(2) C(3)       111.1(5)  ?  ?  ?  ?
  N(1) C(2) H(2a)      109.1(6)  ?  ?  ?  ?
  N(1) C(2) H(2b)      109.2(6)  ?  ?  ?  ?
  C(3) C(2) H(2a)      109.0(6)  ?  ?  ?  ?
  C(3) C(2) H(2b)      109.0(6)  ?  ?  ?  ?
  H(2a) C(2) H(2b)     109.5(7)  ?  ?  ?  ?
  C(2) C(3) C(4)       113.2(5)  ?  ?  ?  ?
  C(2) C(3) H(3a)      108.2(6)  ?  ?  ?  ?
  C(2) C(3) H(3b)      108.5(6)  ?  ?  ?  ?
  C(4) C(3) H(3a)      108.3(6)  ?  ?  ?  ?
  C(4) C(3) H(3b)      109.0(5)  ?  ?  ?  ?
  H(3a) C(3) H(3b)     109.5(6)  ?  ?  ?  ?
  C(3) C(4) C(5)       111.2(5)  ?  ?  ?  ?
  C(3) C(4) H(4a)      108.8(6)  ?  ?  ?  ?
  C(3) C(4) H(4b)      109.4(5)  ?  ?  ?  ?
  C(5) C(4) H(4a)      108.5(5)  ?  ?  ?  ?
  C(5) C(4) H(4b)      109.4(6)  ?  ?  ?  ?
  H(4a) C(4) H(4b)     109.5(6)  ?  ?  ?  ?
  C(4) C(5) C(6)       112.8(5)  ?  ?  ?  ?
  C(4) C(5) H(5a)      109.6(6)  ?  ?  ?  ?
  C(4) C(5) H(5b)      108.4(5)  ?  ?  ?  ?
  C(6) C(5) H(5a)      108.1(5)  ?  ?  ?  ?
  C(6) C(5) H(5b)      108.4(6)  ?  ?  ?  ?
  H(5a) C(5) H(5b)     109.5(6)  ?  ?  ?  ?
  C(5) C(6) N(7)       112.8(5)  ?  ?  ?  ?
  C(5) C(6) H(6a)      107.9(5)  ?  ?  ?  ?
  C(5) C(6) H(6b)      108.4(6)  ?  ?  ?  ?
  N(7) C(6) H(6a)      108.9(6)  ?  ?  ?  ?
  N(7) C(6) H(6b)      109.4(5)  ?  ?  ?  ?
  H(6a) C(6) H(6b)     109.5(6)  ?  ?  ?  ?
  C(6) N(7) C(8)       129.6(5)  ?  ?  ?  ?
  C(6) N(7) O(34)      114.1(5)  ?  ?  ?  ?
  C(8) N(7) O(34)      116.0(5)  ?  ?  ?  ?
  N(7) C(8) C(9)       121.3(7)  ?  ?  ?  ?
  N(7) C(8) O(35)      119.4(6)  ?  ?  ?  ?
  C(9) C(8) O(35)      119.3(7)  ?  ?  ?  ?
  C(8) C(9) C(10)      112.5(5)  ?  ?  ?  ?
  C(8) C(9) H(9a)      109.6(6)  ?  ?  ?  ?
  C(8) C(9) H(9b)      108.5(6)  ?  ?  ?  ?
  C(10) C(9) H(9a)     107.4(6)  ?  ?  ?  ?
  C(10) C(9) H(9b)     109.4(6)  ?  ?  ?  ?
  H(9a) C(9) H(9b)     109.5(6)  ?  ?  ?  ?
  C(9) C(10) C(11)     113.8(6)  ?  ?  ?  ?
  C(9) C(10) H(10a)    107.3(6)  ?  ?  ?  ?
  C(9) C(10) H(10b)    110.2(6)  ?  ?  ?  ?
  C(11) C(10) H(10a)   107.1(6)  ?  ?  ?  ?
  C(11) C(10) H(10b)   108.8(7)  ?  ?  ?  ?
  H(10a) C(10) H(10b)  109.5(8)  ?  ?  ?  ?
  C(10) C(11) O(12)    121.3(7)  ?  ?  ?  ?
  C(10) C(11) N(13)    115.3(8)  ?  ?  ?  ?
  O(12) C(11) N(13)    123.4(7)  ?  ?  ?  ?
  C(11) N(13) C(14)    124.4(7)  ?  ?  ?  ?
  C(11) N(13) H(13)    117.9(7)  ?  ?  ?  ?
  C(14) N(13) H(13)    117.7(6)  ?  ?  ?  ?
  N(13) C(14) C(15)    109.9(6)  ?  ?  ?  ?
  N(13) C(14) H(14a)   108.0(6)  ?  ?  ?  ?
  N(13) C(14) H(14b)   110.4(7)  ?  ?  ?  ?
  C(15) C(14) H(14a)   108.1(7)  ?  ?  ?  ?
  C(15) C(14) H(14b)   110.9(6)  ?  ?  ?  ?
  H(14a) C(14) H(14b)  109.5(8)  ?  ?  ?  ?
  C(14) C(15) C(16)    113.0(6)  ?  ?  ?  ?
  C(14) C(15) H(15a)   110.0(7)  ?  ?  ?  ?
  C(14) C(15) H(15b)   107.6(7)  ?  ?  ?  ?
  C(16) C(15) H(15a)   109.0(7)  ?  ?  ?  ?
  C(16) C(15) H(15b)   107.6(7)  ?  ?  ?  ?
  H(15a) C(15) H(15b)  109.5(7)  ?  ?  ?  ?
  C(15) C(16) C(17)    114.1(6)  ?  ?  ?  ?
  C(15) C(16) H(16a)   107.9(6)  ?  ?  ?  ?
  C(15) C(16) H(16b)   108.7(6)  ?  ?  ?  ?
  C(17) C(16) H(16a)   107.8(6)  ?  ?  ?  ?
  C(17) C(16) H(16b)   108.7(6)  ?  ?  ?  ?
  H(16a) C(16) H(16b)  109.5(7)  ?  ?  ?  ?
  C(16) C(17) C(18)    113.5(6)  ?  ?  ?  ?
  C(16) C(17) H(17a)   108.7(6)  ?  ?  ?  ?
  C(16) C(17) H(17b)   107.7(6)  ?  ?  ?  ?
  C(18) C(17) H(17a)   109.5(6)  ?  ?  ?  ?
  C(18) C(17) H(17b)   107.9(6)  ?  ?  ?  ?
  H(17a) C(17) H(17b)  109.5(7)  ?  ?  ?  ?
  C(17) C(18) N(19)    111.6(5)  ?  ?  ?  ?
  C(17) C(18) H(18a)   110.5(6)  ?  ?  ?  ?
  C(17) C(18) H(18b)   107.7(6)  ?  ?  ?  ?
  N(19) C(18) H(18a)   109.6(6)  ?  ?  ?  ?
  N(19) C(18) H(18b)   107.9(5)  ?  ?  ?  ?
  H(18a) C(18) H(18b)  109.5(6)  ?  ?  ?  ?
  C(18) N(19) C(20)    127.9(5)  ?  ?  ?  ?
  C(18) N(19) O(36)    116.0(5)  ?  ?  ?  ?
  C(20) N(19) O(36)    116.0(5)  ?  ?  ?  ?
  N(19) C(20) C(21)    121.8(6)  ?  ?  ?  ?
  N(19) C(20) O(37)    118.6(6)  ?  ?  ?  ?
  C(21) C(20) O(37)    119.5(6)  ?  ?  ?  ?
  C(20) C(21) C(22)    112.1(6)  ?  ?  ?  ?
  C(20) C(21) H(21a)   108.5(6)  ?  ?  ?  ?
  C(20) C(21) H(21b)   109.0(6)  ?  ?  ?  ?
  C(22) C(21) H(21a)   108.5(6)  ?  ?  ?  ?
  C(22) C(21) H(21b)   109.2(7)  ?  ?  ?  ?
  H(21a) C(21) H(21b)  109.5(7)  ?  ?  ?  ?
  C(21) C(22) C(23)    111.9(6)  ?  ?  ?  ?
  C(21) C(22) H(22a)   107.8(6)  ?  ?  ?  ?
  C(21) C(22) H(22b)   110.6(7)  ?  ?  ?  ?
  C(23) C(22) H(22a)   108.5(7)  ?  ?  ?  ?
  C(23) C(22) H(22b)   108.6(7)  ?  ?  ?  ?
  H(22a) C(22) H(22b)  109.5(7)  ?  ?  ?  ?
  C(22) C(23) O(24)    122.1(7)  ?  ?  ?  ?
  C(22) C(23) N(25)    113.7(8)  ?  ?  ?  ?
  O(24) C(23) N(25)    124.2(8)  ?  ?  ?  ?
  C(23) N(25) C(26)    123.6(7)  ?  ?  ?  ?
  C(23) N(25) H(25)    119.3(8)  ?  ?  ?  ?
  C(26) N(25) H(25)    117.1(7)  ?  ?  ?  ?
  N(25) C(26) C(27)    111.4(7)  ?  ?  ?  ?
  N(25) C(26) H(26a)   108.6(8)  ?  ?  ?  ?
  N(25) C(26) H(26b)   108.9(8)  ?  ?  ?  ?
  C(27) C(26) H(26a)   108.9(8)  ?  ?  ?  ?
  C(27) C(26) H(26b)   109.6(8)  ?  ?  ?  ?
  H(26a) C(26) H(26b)  109.5(9)  ?  ?  ?  ?
  C(26) C(27) C(28)    113.4(6)  ?  ?  ?  ?
  C(26) C(27) H(27a)   109.7(8)  ?  ?  ?  ?
  C(26) C(27) H(27b)   107.7(8)  ?  ?  ?  ?
  C(28) C(27) H(27a)   107.8(8)  ?  ?  ?  ?
  C(28) C(27) H(27b)   108.8(8)  ?  ?  ?  ?
  H(27a) C(27) H(27b)  109.5(8)  ?  ?  ?  ?
  C(27) C(28) C(29)    112.6(7)  ?  ?  ?  ?
  C(27) C(28) H(28a)   108.4(7)  ?  ?  ?  ?
  C(27) C(28) H(28b)   110.0(7)  ?  ?  ?  ?
  C(29) C(28) H(28a)   108.6(7)  ?  ?  ?  ?
  C(29) C(28) H(28b)   107.8(7)  ?  ?  ?  ?
  H(28a) C(28) H(28b)  109.5(7)  ?  ?  ?  ?
  C(28) C(29) C(30)    114.8(6)  ?  ?  ?  ?
  C(28) C(29) H(29a)   108.0(7)  ?  ?  ?  ?
  C(28) C(29) H(29b)   108.0(7)  ?  ?  ?  ?
  C(30) C(29) H(29a)   107.8(6)  ?  ?  ?  ?
  C(30) C(29) H(29b)   108.7(7)  ?  ?  ?  ?
  H(29a) C(29) H(29b)  109.5(7)  ?  ?  ?  ?
  C(29) C(30) N(31)    111.1(5)  ?  ?  ?  ?
  C(29) C(30) H(30a)   107.6(6)  ?  ?  ?  ?
  C(29) C(30) H(30b)   110.6(6)  ?  ?  ?  ?
  N(31) C(30) H(30a)   108.3(6)  ?  ?  ?  ?
  N(31) C(30) H(30b)   109.7(6)  ?  ?  ?  ?
  H(30a) C(30) H(30b)  109.5(7)  ?  ?  ?  ?
  C(30) N(31) C(32)    129.7(6)  ?  ?  ?  ?
  C(30) N(31) O(38)    113.2(5)  ?  ?  ?  ?
  C(32) N(31) O(38)    116.7(5)  ?  ?  ?  ?
  N(31) C(32) C(33)    122.1(6)  ?  ?  ?  ?
  N(31) C(32) O(39)    118.1(6)  ?  ?  ?  ?
  C(33) C(32) O(39)    119.8(6)  ?  ?  ?  ?
  C(32) C(33) H(33a)   109.3(7)  ?  ?  ?  ?
  C(32) C(33) H(33b)   109.3(8)  ?  ?  ?  ?
  C(32) C(33) H(33c)   109.8(6)  ?  ?  ?  ?
  H(33a) C(33) H(33b)  109.5(7)  ?  ?  ?  ?
  H(33a) C(33) H(33c)  109.5(9)  ?  ?  ?  ?
  H(33b) C(33) H(33c)  109.5(7)  ?  ?  ?  ?
  Fe(1) O(34) N(7)     111.2(3)  ?  ?  ?  ?
  Fe(1) O(35) C(8)     112.8(4)  ?  ?  ?  ?
  Fe(1) O(36) N(19)    112.9(3)  ?  ?  ?  ?
  Fe(1) O(37) C(20)    113.8(4)  ?  ?  ?  ?
  Fe(1) O(38) N(31)    112.6(3)  ?  ?  ?  ?
  Fe(1) O(39) C(32)    114.4(4)  ?  ?  ?  ?
  C(42) O(41) C(58)    112.7(8)  ?  ?  ?  ?
  O(41) C(42) C(43)    109.7(8)  ?  ?  ?  ?
  O(41) C(42) H(42a)   109.1(9)  ?  ?  ?  ?
  O(41) C(42) H(42b)   110.7(10)  ?  ?  ?  ?
  C(43) C(42) H(42a)   105.8(10)  ?  ?  ?  ?
  C(43) C(42) H(42b)   111.9(10)  ?  ?  ?  ?
  H(42a) C(42) H(42b)  109.5(10)  ?  ?  ?  ?
  C(42) C(43) O(44)    111.7(8)  ?  ?  ?  ?
  C(42) C(43) H(43a)   106.3(10)  ?  ?  ?  ?
  C(42) C(43) H(43b)   110.4(11)  ?  ?  ?  ?
  O(44) C(43) H(43a)   108.5(10)  ?  ?  ?  ?
  O(44) C(43) H(43b)   110.3(10)  ?  ?  ?  ?
  H(43a) C(43) H(43b)  109.5(9)  ?  ?  ?  ?
  C(43) O(44) C(45)    112.7(8)  ?  ?  ?  ?
  O(44) C(45) C(46)    109.1(7)  ?  ?  ?  ?
  O(44) C(45) H(45a)   109.7(10)  ?  ?  ?  ?
  O(44) C(45) H(45b)   109.2(9)  ?  ?  ?  ?
  C(46) C(45) H(45a)   110.5(10)  ?  ?  ?  ?
  C(46) C(45) H(45b)   108.8(11)  ?  ?  ?  ?
  H(45a) C(45) H(45b)  109.5(9)  ?  ?  ?  ?
  C(45) C(46) O(47)    107.6(9)  ?  ?  ?  ?
  C(45) C(46) H(46a)   110.2(10)  ?  ?  ?  ?
  C(45) C(46) H(46b)   109.3(11)  ?  ?  ?  ?
  O(47) C(46) H(46a)   110.2(11)  ?  ?  ?  ?
  O(47) C(46) H(46b)   110.0(10)  ?  ?  ?  ?
  H(46a) C(46) H(46b)  109.5(11)  ?  ?  ?  ?
  C(46) O(47) C(48)    111.7(9)  ?  ?  ?  ?
  O(47) C(48) C(49)    113.4(9)  ?  ?  ?  ?
  O(47) C(48) H(48a)   108.6(11)  ?  ?  ?  ?
  O(47) C(48) H(48b)   109.9(12)  ?  ?  ?  ?
  C(49) C(48) H(48a)   109.7(12)  ?  ?  ?  ?
  C(49) C(48) H(48b)   105.7(11)  ?  ?  ?  ?
  H(48a) C(48) H(48b)  109.5(11)  ?  ?  ?  ?
  C(48) C(49) O(50)    109.6(8)  ?  ?  ?  ?
  C(48) C(49) H(49a)   109.9(12)  ?  ?  ?  ?
  C(48) C(49) H(49b)   110.7(12)  ?  ?  ?  ?
  O(50) C(49) H(49a)   108.7(12)  ?  ?  ?  ?
  O(50) C(49) H(49b)   108.5(11)  ?  ?  ?  ?
  H(49a) C(49) H(49b)  109.5(10)  ?  ?  ?  ?
  C(49) O(50) C(51)    114.8(10)  ?  ?  ?  ?
  O(50) C(51) C(52)    111.2(11)  ?  ?  ?  ?
  O(50) C(51) H(51a)   109.3(11)  ?  ?  ?  ?
  O(50) C(51) H(51b)   109.9(15)  ?  ?  ?  ?
  C(52) C(51) H(51a)   108.3(16)  ?  ?  ?  ?
  C(52) C(51) H(51b)   108.7(12)  ?  ?  ?  ?
  H(51a) C(51) H(51b)  109.5(12)  ?  ?  ?  ?
  C(51) C(52) O(53)    115.4(10)  ?  ?  ?  ?
  C(51) C(52) H(52a)   107.5(14)  ?  ?  ?  ?
  C(51) C(52) H(52b)   108.6(18)  ?  ?  ?  ?
  O(53) C(52) H(52a)   109.4(18)  ?  ?  ?  ?
  O(53) C(52) H(52b)   106.4(13)  ?  ?  ?  ?
  H(52a) C(52) H(52b)  109.5(12)  ?  ?  ?  ?
  C(52) O(53) C(54)    117.3(11)  ?  ?  ?  ?
  O(53) C(54) C(55)    107.8(11)  ?  ?  ?  ?
  O(53) C(54) H(54a)   109.3(14)  ?  ?  ?  ?
  O(53) C(54) H(54b)   110.7(15)  ?  ?  ?  ?
  C(55) C(54) H(54a)   110.7(16)  ?  ?  ?  ?
  C(55) C(54) H(54b)   108.9(15)  ?  ?  ?  ?
  H(54a) C(54) H(54b)  109.5(13)  ?  ?  ?  ?
  C(54) C(55) O(56)    109.6(11)  ?  ?  ?  ?
  C(54) C(55) H(55a)   109.5(15)  ?  ?  ?  ?
  C(54) C(55) H(55b)   107.8(14)  ?  ?  ?  ?
  O(56) C(55) H(55a)   110.7(13)  ?  ?  ?  ?
  O(56) C(55) H(55b)   109.7(14)  ?  ?  ?  ?
  H(55a) C(55) H(55b)  109.5(14)  ?  ?  ?  ?
  C(55) O(56) C(57)    110.3(10)  ?  ?  ?  ?
  O(56) C(57) C(58)    109.0(8)  ?  ?  ?  ?
  O(56) C(57) H(57a)   108.7(11)  ?  ?  ?  ?
  O(56) C(57) H(57b)   109.1(14)  ?  ?  ?  ?
  C(58) C(57) H(57a)   111.4(15)  ?  ?  ?  ?
  C(58) C(57) H(57b)   109.1(12)  ?  ?  ?  ?
  H(57a) C(57) H(57b)  109.5(10)  ?  ?  ?  ?
  O(41) C(58) C(57)    110.3(9)  ?  ?  ?  ?
  O(41) C(58) H(58a)   108.2(10)  ?  ?  ?  ?
  O(41) C(58) H(58b)   111.2(10)  ?  ?  ?  ?
  C(57) C(58) H(58a)   107.7(10)  ?  ?  ?  ?
  C(57) C(58) H(58b)   109.9(10)  ?  ?  ?  ?
  H(58a) C(58) H(58b)  109.5(11)  ?  ?  ?  ?
  O(81) Cl(1) O(82)    110.9(4)  ?  ?  ?  ?
  O(81) Cl(1) O(83)    112.3(4)  ?  ?  ?  ?
  O(81) Cl(1) O(84)    108.7(4)  ?  ?  ?  ?
  O(82) Cl(1) O(83)    108.0(5)  ?  ?  ?  ?
  O(82) Cl(1) O(84)    104.7(5)  ?  ?  ?  ?
  O(83) Cl(1) O(84)    112.0(5)  ?  ?  ?  ?
  O(85) Cl(2) O(86)    110.8(5)  ?  ?  ?  ?
  O(85) Cl(2) O(87)    111.0(4)  ?  ?  ?  ?
  O(85) Cl(2) O(88)    105.3(4)  ?  ?  ?  ?
  O(86) Cl(2) O(87)    113.0(6)  ?  ?  ?  ?
  O(86) Cl(2) O(88)    104.6(5)  ?  ?  ?  ?
  O(87) Cl(2) O(88)    111.8(6)  ?  ?  ?  ?
  Mg(1) O(91) H(91a)    76.9(3)  ?  ?  ?  ?
  Mg(1) O(91) H(91b)   113.2(3)  ?  ?  ?  ?
  H(91a) O(91) H(91b)   90.0(3)  ?  ?  ?  ?
  Mg(1) O(92) H(92a)   115.6(3)  ?  ?  ?  ?
  Mg(1) O(92) H(92b)   122.2(3)  ?  ?  ?  ?
  H(92a) O(92) H(92b)  122.2(4)  ?  ?  ?  ?
  Mg(1) O(93) H(93a)   127.4(3)  ?  ?  ?  ?
  Mg(1) O(93) H(93b)   116.3(3)  ?  ?  ?  ?
  H(93a) O(93) H(93b)  116.3(4)  ?  ?  ?  ?
  H(94a) O(94) H(94b)  125.7(5)  ?  ?  ?  ?
  H(95a) O(95) H(95b)  109.5(6)  ?  ?  ?  ?
  H(96a) O(96) H(96b)  129.4(6)  ?  ?  ?  ?
  C(98) C(97) H(97a)   112.6(17)  ?  ?  ?  ?
  C(98) C(97) H(97b)   106.8(18)  ?  ?  ?  ?
  C(98) C(97) H(97c)   108.9(22)  ?  ?  ?  ?
  H(97a) C(97) H(97b)  109.5(24)  ?  ?  ?  ?
  H(97a) C(97) H(97c)  109.5(18)  ?  ?  ?  ?
  H(97b) C(97) H(97c)  109.5(15)  ?  ?  ?  ?
  C(97) C(98) O(99)    137.1(19)  ?  ?  ?  ?
  C(97) C(98) H(98a)   102.5(20)  ?  ?  ?  ?
  C(97) C(98) H(98b)   100(3)  ?  ?  ?  ?
  O(99) C(98) H(98a)   105(3)  ?  ?  ?  ?
  O(99) C(98) H(98b)   100.1(18)  ?  ?  ?  ?
  H(98a) C(98) H(98b)  109.5(20)  ?  ?  ?  ?
  C(98) O(99) H(99)    108.5(19)  ?  ?  ?  ?
  Mg(1) H(91a) O(91)    76.41(25)  ?  ?  ?  ?
  Mg(1) H(91a) H(91b)   96.4  ?  ?  ?  ?
  O(91) H(91a) H(91b)   45.02(24)  ?  ?  ?  ?
  O(91) H(91b) H(91a)   45.0(3)  ?  ?  ?  ?

loop_
     _geom_torsion_atom_site_label_1
     _geom_torsion_atom_site_label_2
     _geom_torsion_atom_site_label_3
     _geom_torsion_atom_site_label_4
     _geom_torsion
     _geom_torsion_site_symmetry_1
     _geom_torsion_site_symmetry_2
     _geom_torsion_site_symmetry_3
     _geom_torsion_site_symmetry_4
     _geom_torsion_publ_flag
    ?   ?   ?   ?   ?   ?   ?   ?   ?   ?

#===============================================================================
# Additional structures (sections 5-10 and associated data_? identifiers)
# may be added at this point.
#===============================================================================

# The following lines are used to test the character set of files sent by
# network email or other means. They are not part of the CIF data set.
# abcdefghijklmnopqrstuvwxyzABCDEFGHIJKLMNOPQRSTUVWXYZ0123456789
# !@#$%^&*()_+{}:"~<>?|\-=[];,./
